# Supplementary material for: Multianalyte liquid biopsy to aid the diagnostic workup of breast cancer
Source: PubMed Central journal article supplement (PMC9515081; doi:10.1038/s41523-022-00480-4), 2022-09-27
Supplement: 41523_2022_480_MOESM1_ESM.pdf [file 41523_2022_480_MOESM1_ESM.pdf]

**Supplementary Table 1**

|                       | Patients | Early Stage |      | Late Stage |     |
|-----------------------|----------|-------------|------|------------|-----|
|                       |          | n           | %    | n          | %   |
| Sex                   | Female   | 74          | 100  | 26         | 100 |
|                       | Male     | 0           | 0    | 0          | 0   |
|                       | N/A      | 0           | 0    | 0          | 0   |
| Stage                 | Early    | 74          | 100  | 0          | 0   |
|                       | Late     | 0           | 0    | 26         | 100 |
|                       | N/A      | 0           | 0    | 0          | 0   |
| ER Status             | Positive | 47          | 64   | 9          | 35  |
|                       | Negative | 6           | 8    | 6          | 23  |
|                       | N/A      | 21          | 28   | 11         | 42  |
| PR Status             | Positive | 43          | 58   | 6          | 23  |
|                       | Negative | 11          | 15   | 9          | 35  |
|                       | N/A      | 20          | 27   | 11         | 42  |
| HER2 Status           | Positive | 7           | 9.5  | 4          | 15  |
|                       | Negative | 40          | 54   | 10         | 39  |
|                       | N/A      | 27          | 36.5 | 12         | 46  |
| Histological Subtypes | Ductal   | 48          | 58   | 11         | 23  |
|                       | Lobular  | 5           | 15   | 3          | 35  |
|                       | Other    | 1           | 27   | 0          | 42  |
|                       | N/A      | 20          | 27   | 12         | 42  |
| Tumor Grade           | 1        | 24          | 32.5 | 1          | 4   |
|                       | 2        | 21          | 28.5 | 6          | 23  |
|                       | 3        | 9           | 12   | 5          | 19  |
|                       | N/A      | 20          | 27   | 14         | 54  |

N/A: data not provided.

## Supplementary Figure 1

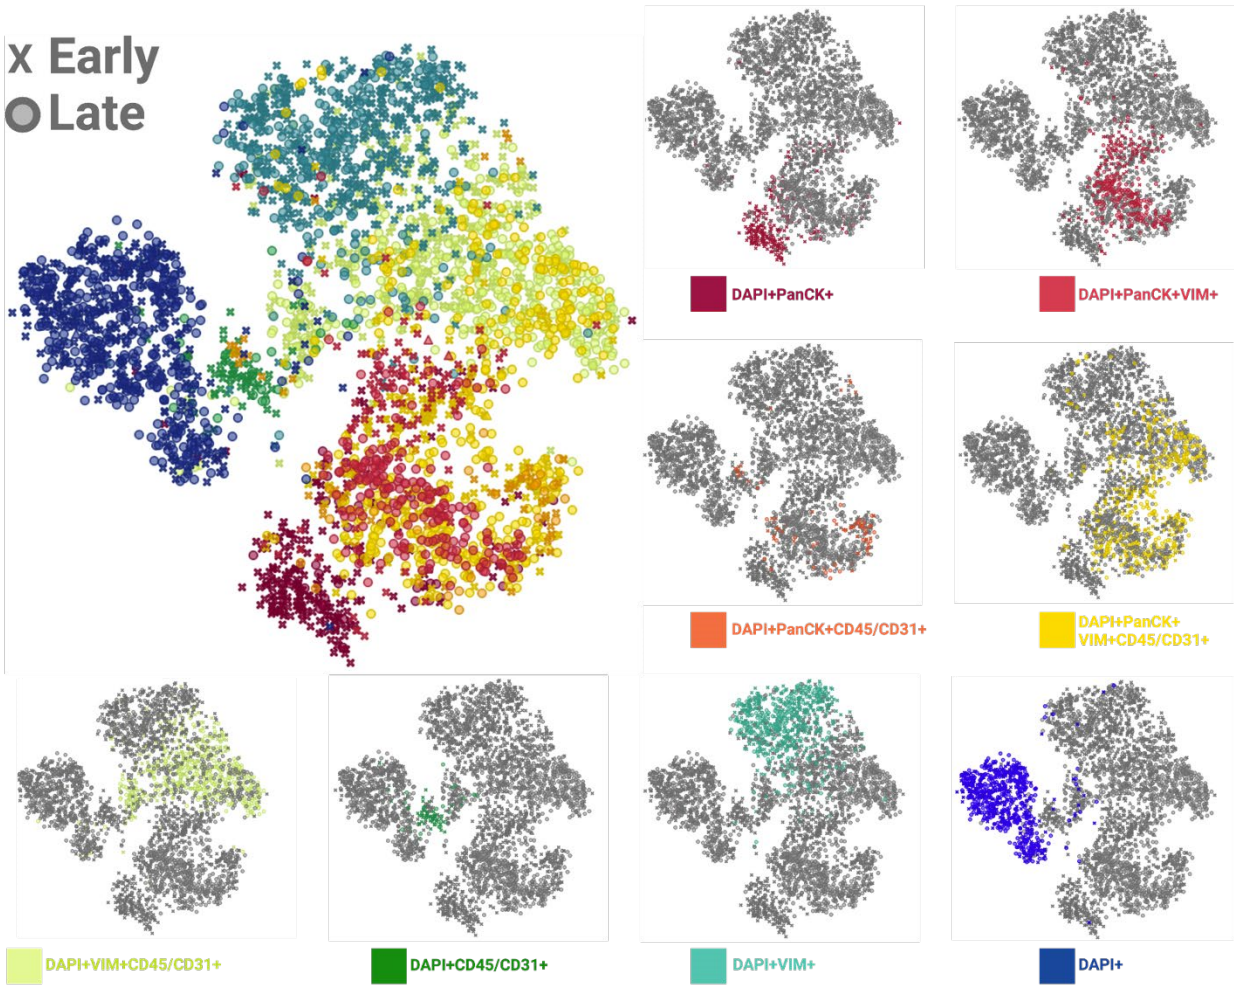

Supplementary Figure 1. Visualization of rare cell features. T-SNE embedding of rare cells based on morphometric features derived from OCULAR. Each designated color represents a classification group marked in the figure.
